# Supplementary material for: With or without reirradiation in advanced local recurrent nasopharyngeal carcinoma: a case–control study
Source: PubMed Central journal article supplement (PMC5054630; doi:10.1186/s12885-016-2803-2), 2016-10-07
Supplement: 12885_2016_2803_MOESM1_ESM.pdf [file 12885_2016_2803_MOESM1_ESM.pdf]

| ID | Age Range | Pathology | Interval | TI (month) | KPS | EBV DNA | rT stage | rN stage | rM stage |
|----|-----------|-----------|----------|------------|-----|---------|----------|----------|----------|
| 1  | 21-30     | 1         | 7.0      | 84         | 60  | 41500   | 4        | 0        | 0        |
| 2  | 21-30     | 1         | 1.0      | 12         | 100 | 0       | 3        | 1        | 0        |
| 3  | 21-30     | 1         | 3.3      | 40         | 90  | 0       | 3        | 0        | 0        |
| 4  | 31-40     | 0         | 1.6      | 19         | 80  | 183     | 3        | 1        | 0        |
| 5  | 31-40     | 1         | 3.2      | 38         | 90  | 0       | 4        | 0        | 0        |
| 6  | 31-40     | 1         | 3.5      | 42         | 60  | 9430    | 4        | 0        | 0        |
| 7  | 31-40     | 1         | 3.5      | 42         | 60  | 183     | 4        | 0        | 0        |
| 8  | 31-40     | 1         | 2.4      | 29         | 90  | 2880    | 4        | 0        | 0        |
| 9  | 31-40     | 1         | 2.9      | 35         | 80  | 0       | 4        | 0        | 0        |
| 10 | 31-40     | 1         | 6.1      | 73         | 90  | 0       | 4        | 0        | 0        |
| 11 | 31-40     | 1         | 2.8      | 33         | 90  | 0       | 3        | 0        | 0        |
| 12 | 31-40     | 1         | 1.4      | 17         | 80  | 25500   | 4        | 1        | 0        |
| 13 | 31-40     | 0         | 3.0      | 36         | 90  | 3970    | 4        | 0        | 0        |
| 14 | 31-40     | 0         | 1.3      | 15         | 80  | 0       | 4        | 0        | 0        |
| 15 | 31-40     | 1         | 3.8      | 45         | 90  | 28000   | 3        | 1        | 0        |
| 16 | 31-40     | 1         | 1.9      | 23         | 80  | 0       | 4        | 0        | 0        |
| 17 | 31-40     | 1         | 2.9      | 35         | 90  | 17600   | 4        | 0        | 0        |
| 18 | 31-40     | 1         | 2.1      | 25         | 90  | 1990    | 4        | 0        | 0        |
| 19 | 31-40     | 1         | 3.1      | 37         | 90  | 1530    | 3        | 1        | 0        |
| 20 | 31-40     | 0         | 2.8      | 33         | 90  | 0       | 4        | 0        | 0        |
| 21 | 31-40     | 1         | 1.1      | 13         | 70  | 0       | 3        | 0        | 0        |
| 22 | 31-40     | 1         | 8.0      | 96         | 90  | 183     | 4        | 0        | 0        |
| 23 | 41-50     | 1         | 1.2      | 14         | 90  | 183     | 4        | 1        | 0        |
| 24 | 41-50     | 1         | 1.9      | 23         | 90  | 183     | 3        | 0        | 0        |
| 25 | 41-50     | 1         | 1.4      | 17         | 90  | 183     | 4        | 0        | 0        |
| 26 | 41-50     | 0         | 2.3      | 27         | 90  | 0       | 4        | 1        | 0        |
| 27 | 41-50     | 1         | 2.4      | 29         | 90  | 15200   | 4        | 1        | 0        |
| 28 | 41-50     | 1         | 1.1      | 13         | 90  | 0       | 4        | 0        | 0        |
| 29 | 41-50     | 1         | 9.3      | 112        | 90  | 3010    | 3        | 0        | 0        |
| 30 | 41-50     | 0         | 1.8      | 21         | 90  | 0       | 4        | 0        | 0        |
| 31 | 41-50     | 0         | 2.1      | 25         | 90  | 634     | 4        | 1        | 0        |
| 32 | 41-50     | 1         | 5.3      | 64         | 90  | 0       | 4        | 1        | 0        |
| 33 | 41-50     | 1         | 4.3      | 51         | 90  | 295     | 3        | 0        | 0        |
| 34 | 41-50     | 1         | 3.6      | 43         | 70  | 183     | 4        | 0        | 0        |
| 35 | 41-50     | 1         | 1.1      | 13         | 90  | 43200   | 4        | 1        | 0        |
| 36 | 41-50     | 0         | 0.9      | 11         | 90  | 1600    | 4        | 0        | 0        |
| 37 | 41-50     | 1         | 0.8      | 9          | 90  | 0       | 3        | 0        | 0        |
| 38 | 41-50     | 1         | 2.7      | 32         | 90  | 3590    | 4        | 1        | 0        |
| 39 | 41-50     | 1         | 0.5      | 6          | 90  | 80700   | 3        | 0        | 0        |
| 40 | 41-50     | 1         | 2.5      | 30         | 90  | 0       | 4        | 1        | 0        |
| 41 | 41-50     | 1         | 1.6      | 19         | 90  | 0       | 3        | 1        | 0        |
| 42 | 41-50     | 1         | 15.2     | 182        | 90  | 0       | 3        | 1        | 0        |
| 43 | 41-50     | 1         | 1.2      | 14         | 80  | 0       | 4        | 0        | 0        |
| 44 | 41-50     | 1         | 1.1      | 13         | 90  | 183     | 4        | 0        | 0        |
| 45 | 41-50     | 1         | 4.3      | 51         | 90  | 0       | 3        | 0        | 0        |
| 46 | 41-50     | 1         | 1.3      | 15         | 90  | 0       | 3        | 1        | 0        |
| 47 | 41-50     | 1         | 1.8      | 22         | 70  | 0       | 3        | 0        | 0        |
| 48 | 41-50     | 1         | 1.8      | 22         | 90  | 0       | 4        | 1        | 0        |
| 49 | 41-50     | 1         | 3.4      | 41         | 90  | 183     | 3        | 0        | 0        |
| 50 | 41-50     | 1         | 1.7      | 20         | 90  | 606     | 3        | 0        | 0        |
| 51 | 41-50     | 1         | 1.5      | 18         | 90  | 18400   | 3        | 0        | 0        |

|          |   |      |     |    |       |   |   |   |
|----------|---|------|-----|----|-------|---|---|---|
| 52 41-50 | 0 | 1.0  | 12  | 80 | 183   | 3 | 0 | 0 |
| 53 41-50 | 1 | 0.2  | 2   | 90 | 600   | 4 | 1 | 0 |
| 54 41-50 | 1 | 2.3  | 28  | 90 | 4420  | 4 | 1 | 0 |
| 55 41-50 | 0 | 2.1  | 25  | 90 | 0     | 3 | 1 | 0 |
| 56 41-50 | 1 | 10.2 | 122 | 90 | 0     | 3 | 0 | 0 |
| 57 41-50 | 1 | 2.0  | 24  | 90 | 0     | 3 | 0 | 0 |
| 58 41-50 | 1 | 1.7  | 20  | 90 | 183   | 3 | 0 | 0 |
| 59 41-50 | 1 | 1.5  | 18  | 90 | 0     | 3 | 0 | 0 |
| 60 41-50 | 1 | 5.6  | 67  | 90 | 0     | 3 | 0 | 0 |
| 61 41-50 | 1 | 4.2  | 50  | 90 | 26600 | 3 | 0 | 0 |
| 62 41-50 | 1 | 3.7  | 44  | 90 | 29700 | 3 | 0 | 0 |
| 63 51-60 | 1 | 2.3  | 28  | 90 | 12900 | 3 | 0 | 0 |
| 64 51-60 | 1 | 3.6  | 43  | 90 | 183   | 3 | 0 | 0 |
| 65 51-60 | 1 | 3.7  | 44  | 90 | 183   | 4 | 0 | 0 |
| 66 51-60 | 1 | 1.7  | 20  | 90 | 183   | 4 | 1 | 0 |
| 67 51-60 | 0 | 2.2  | 26  | 90 | 5660  | 4 | 0 | 0 |
| 68 51-60 | 1 | 2.7  | 32  | 60 | 183   | 4 | 0 | 0 |
| 69 51-60 | 0 | 3.2  | 38  | 90 | 0     | 4 | 0 | 0 |
| 70 51-60 | 0 | 6.4  | 77  | 90 | 192   | 3 | 0 | 0 |
| 71 51-60 | 1 | 1.0  | 12  | 90 | 183   | 4 | 0 | 0 |
| 72 51-60 | 0 | 1.6  | 19  | 70 | 4980  | 4 | 0 | 0 |
| 73 51-60 | 1 | 1.4  | 17  | 90 | 183   | 4 | 0 | 0 |
| 74 51-60 | 0 | 0.8  | 10  | 80 | 183   | 4 | 0 | 0 |
| 75 51-60 | 1 | 7.8  | 94  | 90 | 0     | 4 | 0 | 0 |
| 76 51-60 | 1 | 3.4  | 41  | 90 | 1840  | 3 | 0 | 0 |
| 77 51-60 | 0 | 1.2  | 14  | 90 | 183   | 3 | 0 | 0 |
| 78 51-60 | 1 | 2.3  | 27  | 80 | 183   | 4 | 0 | 0 |
| 79 51-60 | 1 | 10.1 | 121 | 90 | 46300 | 3 | 0 | 0 |
| 80 51-60 | 1 | 1.9  | 23  | 90 | 4070  | 3 | 0 | 0 |
| 81 51-60 | 1 | 3.3  | 39  | 90 | 0     | 3 | 0 | 0 |
| 82 51-60 | 0 | 1.3  | 16  | 90 | 183   | 3 | 0 | 0 |
| 83 51-60 | 1 | 1.8  | 22  | 90 | 1333  | 3 | 0 | 0 |
| 84 61-70 | 1 | 1.8  | 22  | 90 | 0     | 4 | 0 | 0 |
| 85 61-70 | 1 | 0.6  | 7   | 90 | 4680  | 4 | 1 | 0 |
| 86 61-70 | 0 | 1.4  | 17  | 90 | 0     | 4 | 0 | 0 |
| 87 61-70 | 1 | 1.8  | 21  | 80 | 5660  | 4 | 0 | 0 |
| 88 61-70 | 1 | 1.5  | 18  | 90 | 183   | 3 | 0 | 0 |

| Significa | Reirradia | Dose of F | Volume | Mean dose | Max dose | Mini Dose | Fraction | Chemthera | Local | Fai |
|-----------|-----------|-----------|--------|-----------|----------|-----------|----------|-----------|-------|-----|
| 0         | 1         | 64        | 62.8   | 63        | 67.2     | 58.9      | 29       | 1         | 1     |     |
| 0         | 0         |           |        |           |          |           |          | 1         | 1     |     |
| 1         | 0         |           |        |           |          |           |          | 1         | 1     |     |
| 1         | 1         | 64        | 53.8   | 64        | 71       | 57        | 29       | 1         | 1     |     |
| 0         | 1         | 64        | 113.7  | 66.9      | 70.1     | 62.8      | 28       | 1         | 0     |     |
| 0         | 0         |           |        |           |          |           |          | 1         | 1     |     |
| 0         | 1         | 64        | 48.9   | 70.1      | 73       | 67.2      | 33       | 1         | 1     |     |
| 0         | 0         |           |        |           |          |           |          | 1         | 0     |     |
| 0         | 0         |           |        |           |          |           |          | 1         | 1     |     |
| 0         | 1         | 64        | 87.5   | 68.7      | 71.7     | 65.9      | 32       | 1         | 0     |     |
| 0         | 1         | 64        | 28.3   | 68        | 72.3     | 64        | 32       | 1         | 1     |     |
| 0         | 1         | 66        | 55.1   | 68.7      | 71.9     | 65.3      | 33       | 1         | 0     |     |
| 0         | 0         |           |        |           |          |           |          | 1         | 0     |     |
| 1         | 0         |           |        |           |          |           |          | 1         | 0     |     |
| 1         | 1         | 60        | 58.3   | 62.5      | 66.1     | 59.2      | 30       | 1         | 0     |     |
| 1         | 1         | 64        | 48.1   | 68.3      | 71.7     | 59.9      | 32       | 1         | 0     |     |
| 0         | 1         | 60        | 33.2   | 63.9      | 66       | 61.8      | 28       | 0         | 1     |     |
| 0         | 0         |           |        |           |          |           |          | 1         | 1     |     |
| 0         | 0         |           |        |           |          |           |          | 1         | 1     |     |
| 1         | 1         | 64        | 44.2   | 66.6      | 71.7     | 61.4      | 33       | 1         | 0     |     |
| 1         | 0         |           |        |           |          |           |          | 1         | 0     |     |
| 0         | 0         |           |        |           |          |           |          | 1         | 1     |     |
| 1         | 1         | 64        | 45.3   | 67.8      | 69.8     | 65.9      | 32       | 1         | 0     |     |
| 0         | 1         | 60        | 35.3   | 62.6      | 66.6     | 58.2      | 27       | 1         | 0     |     |
| 1         | 1         | 64        | 103.8  | 68.8      | 74.9     | 62.7      | 32       | 1         | 0     |     |
| 1         | 1         | 64        | 56.1   | 69.1      | 73       | 65.3      | 32       | 1         | 1     |     |
| 0         | 1         | 60        | 15.2   | 64.6      | 66.8     | 61.6      | 30       | 1         | 0     |     |
| 0         | 1         |           | 59.5   | 66.7      | 71.3     | 64.5      |          | 1         | 0     |     |
| 0         | 1         | 62        | 69.3   | 65.4      | 72.8     | 57.8      | 31       | 1         | 0     |     |
| 0         | 0         |           |        |           |          |           |          | 1         | 1     |     |
| 0         | 0         |           |        |           |          |           |          | 1         | 1     |     |
| 0         | 0         |           |        |           |          |           |          | 1         | 0     |     |
| 0         | 0         |           |        |           |          |           |          | 1         | 0     |     |
| 1         | 1         | 66        | 26.1   | 67.7      | 70       | 65.3      | 32       | 0         | 0     |     |
| 0         | 1         | 63        | 79.1   | 63.5      | 64.9     | 62.4      | 30       | 1         | 0     |     |
| 0         | 0         |           |        |           |          |           |          | 1         | 1     |     |
| 0         | 0         |           |        |           |          |           |          | 1         | 1     |     |
| 0         | 0         |           |        |           |          |           |          | 1         | 0     |     |
| 1         | 1         | 64        | 59.2   | 67.8      | 72.2     | 65.5      | 32       | 1         | 0     |     |
| 1         | 1         | 68        | 59.1   | 72.4      | 76.2     | 69.4      | 30       | 1         | 1     |     |
| 1         | 0         |           |        |           |          |           |          | 1         | 1     |     |
| 0         | 0         |           |        |           |          |           |          | 1         | 1     |     |
| 0         | 1         | 64        | 27.9   | 65.9      | 72.3     | 59.5      | 30       | 1         | 0     |     |
| 1         | 1         | 60        | 57.5   | 63.2      | 66       | 60.6      | 30       | 1         | 1     |     |
| 0         | 1         | 60        | 89.5   | 61.6      | 66       | 57.6      | 27       | 1         | 0     |     |
| 0         | 1         | 60        | 121.8  | 60.7      | 64.8     | 56.4      | 27       | 0         | 0     |     |
| 1         | 1         | 66        | 28.7   | 69.7      | 72.5     | 67        | 29       | 0         | 1     |     |
| 1         | 1         | 66        | 39.3   | 64.7      | 70.6     | 58.7      | 30       | 1         | 0     |     |
| 0         | 0         |           |        |           |          |           |          | 1         | 0     |     |
| 0         | 1         | 64        | 21.3   | 66.3      | 68.3     | 64.4      | 30       | 1         | 1     |     |
| 0         | 1         | 64        | 63.7   | 66.4      | 71.3     | 56.8      | 28       | 1         | 1     |     |



| Distant | FProgressi | Death | LFS | DMFS | TTP | OS |    |
|---------|------------|-------|-----|------|-----|----|----|
| 0       | 1          | 1     | 1   | 8    | 8   | 8  | 8  |
| 0       | 1          | 1     | 1   | 22   | 31  | 22 | 31 |
| 0       | 1          | 1     | 1   | 3    | 18  | 3  | 18 |
| 0       | 1          | 0     | 0   | 27   | 44  | 27 | 44 |
| 0       | 0          | 0     | 0   | 27   | 27  | 11 | 27 |
| 0       | 1          | 0     | 0   | 16   | 23  | 16 | 23 |
| 0       | 1          | 1     | 1   | 18   | 24  | 18 | 24 |
| 0       | 0          | 0     | 0   | 23   | 23  | 23 | 23 |
| 1       | 1          | 0     | 0   | 30   | 16  | 16 | 40 |
| 0       | 0          | 0     | 0   | 43   | 43  | 43 | 43 |
| 1       | 1          | 0     | 0   | 25   | 24  | 24 | 33 |
| 0       | 0          | 0     | 0   | 81   | 81  | 81 | 81 |
| 1       | 1          | 1     | 1   | 38   | 3   | 3  | 38 |
| 0       | 0          | 1     | 1   | 32   | 32  | 32 | 32 |
| 0       | 0          | 0     | 0   | 32   | 32  | 32 | 32 |
| 0       | 0          | 0     | 0   | 23   | 23  | 23 | 23 |
| 1       | 1          | 1     | 1   | 24   | 43  | 24 | 44 |
| 0       | 1          | 0     | 0   | 10   | 23  | 10 | 23 |
| 0       | 1          | 1     | 1   | 18   | 26  | 18 | 26 |
| 0       | 0          | 1     | 1   | 27   | 27  | 27 | 27 |
| 0       | 0          | 1     | 1   | 25   | 25  | 25 | 25 |
| 0       | 1          | 1     | 1   | 25   | 27  | 25 | 27 |
| 1       | 1          | 1     | 1   | 26   | 2   | 2  | 26 |
| 1       | 1          | 0     | 0   | 15   | 8   | 8  | 15 |
| 0       | 0          | 1     | 1   | 35   | 35  | 23 | 35 |
| 0       | 1          | 1     | 1   | 3    | 11  | 3  | 11 |
| 0       | 0          | 0     | 0   | 37   | 37  | 37 | 37 |
| 0       | 0          | 0     | 0   | 23   | 23  | 23 | 23 |
| 0       | 0          | 0     | 0   | 25   | 25  | 25 | 25 |
| 0       | 1          | 1     | 1   | 8    | 13  | 8  | 13 |
| 0       | 1          | 0     | 0   | 8    | 38  | 8  | 38 |
| 0       | 0          | 0     | 0   | 43   | 43  | 43 | 43 |
| 1       | 1          | 1     | 1   | 34   | 0   | 0  | 34 |
| 0       | 0          | 1     | 1   | 34   | 34  | 34 | 34 |
| 0       | 0          | 0     | 0   | 15   | 15  | 15 | 15 |
| 0       | 1          | 0     | 0   | 17   | 23  | 17 | 23 |
| 0       | 1          | 1     | 1   | 25   | 38  | 25 | 38 |
| 0       | 0          | 0     | 0   | 34   | 34  | 34 | 34 |
| 0       | 0          | 1     | 1   | 27   | 27  | 27 | 27 |
| 0       | 1          | 0     | 0   | 11   | 28  | 11 | 28 |
| 0       | 1          | 1     | 1   | 25   | 32  | 25 | 32 |
| 0       | 1          | 1     | 1   | 7    | 8   | 7  | 8  |
| 0       | 0          | 1     | 1   | 11   | 11  | 11 | 11 |
| 0       | 1          | 1     | 1   | 23   | 39  | 23 | 39 |
| 0       | 0          | 0     | 0   | 28   | 28  | 18 | 28 |
| 0       | 0          | 0     | 0   | 54   | 54  | 54 | 54 |
| 0       | 1          | 1     | 1   | 11   | 27  | 11 | 27 |
| 0       | 0          | 1     | 1   | 10   | 10  | 10 | 10 |
| 0       | 0          | 0     | 0   | 85   | 85  | 85 | 85 |
| 0       | 1          | 0     | 0   | 34   | 35  | 34 | 35 |
| 1       | 1          | 0     | 0   | 7    | 7   | 7  | 24 |

|   |   |   |    |    |    |    |
|---|---|---|----|----|----|----|
| 0 | 0 | 0 | 82 | 82 | 82 | 82 |
| 0 | 1 | 0 | 20 | 23 | 20 | 23 |
| 0 | 1 | 1 | 25 | 36 | 25 | 36 |
| 0 | 0 | 1 | 38 | 38 | 38 | 38 |
| 0 | 0 | 0 | 37 | 37 | 37 | 37 |
| 0 | 0 | 0 | 28 | 28 | 28 | 28 |
| 0 | 0 | 1 | 16 | 16 | 16 | 16 |
| 0 | 0 | 1 | 6  | 6  | 6  | 6  |
| 0 | 0 | 0 | 24 | 24 | 24 | 24 |
| 0 | 0 | 0 | 37 | 37 | 26 | 37 |
| 0 | 0 | 0 | 23 | 23 | 23 | 23 |
| 0 | 1 | 1 | 29 | 35 | 29 | 35 |
| 0 | 0 | 0 | 15 | 15 | 15 | 15 |
| 0 | 1 | 1 | 27 | 32 | 27 | 32 |
| 0 | 0 | 1 | 16 | 16 | 16 | 16 |
| 0 | 0 | 0 | 23 | 23 | 23 | 23 |
| 0 | 1 | 1 | 6  | 34 | 6  | 34 |
| 1 | 1 | 1 | 27 | 21 | 21 | 27 |
| 0 | 0 | 1 | 17 | 17 | 17 | 17 |
| 0 | 0 | 0 | 68 | 68 | 68 | 68 |
| 0 | 1 | 1 | 6  | 12 | 6  | 12 |
| 0 | 0 | 0 | 37 | 37 | 37 | 37 |
| 0 | 1 | 1 | 14 | 44 | 14 | 44 |
| 0 | 0 | 0 | 23 | 23 | 23 | 23 |
| 0 | 0 | 0 | 15 | 15 | 15 | 15 |
| 0 | 0 | 0 | 51 | 51 | 51 | 51 |
| 0 | 1 | 1 | 22 | 27 | 22 | 27 |
| 0 | 0 | 1 | 35 | 35 | 23 | 35 |
| 0 | 0 | 1 | 25 | 25 | 25 | 25 |
| 0 | 0 | 1 | 51 | 51 | 51 | 51 |
| 0 | 1 | 1 | 8  | 34 | 8  | 34 |
| 1 | 1 | 1 | 5  | 20 | 5  | 26 |
| 0 | 0 | 1 | 9  | 9  | 9  | 9  |
| 1 | 1 | 0 | 19 | 14 | 14 | 19 |
| 0 | 0 | 0 | 21 | 21 | 21 | 21 |
| 0 | 0 | 0 | 26 | 26 | 26 | 26 |
| 0 | 0 | 0 | 75 | 75 | 75 | 75 |
